# Supplementary material for: Antagonistic activity of auxin and cytokinin in shoot and root organs
Source: PubMed Central journal article supplement (PMC6508789; doi:10.1002/pld3.121), 2019-02-25
Supplement: PLD3-3-e00121-s001.pdf [file PLD3-3-e00121-s001.pdf]

## Supporting Information

**Figure S1.** Increased *ARR5p::GUS* expression in *axr* mutants is correlated with the strength of the auxin resistance.

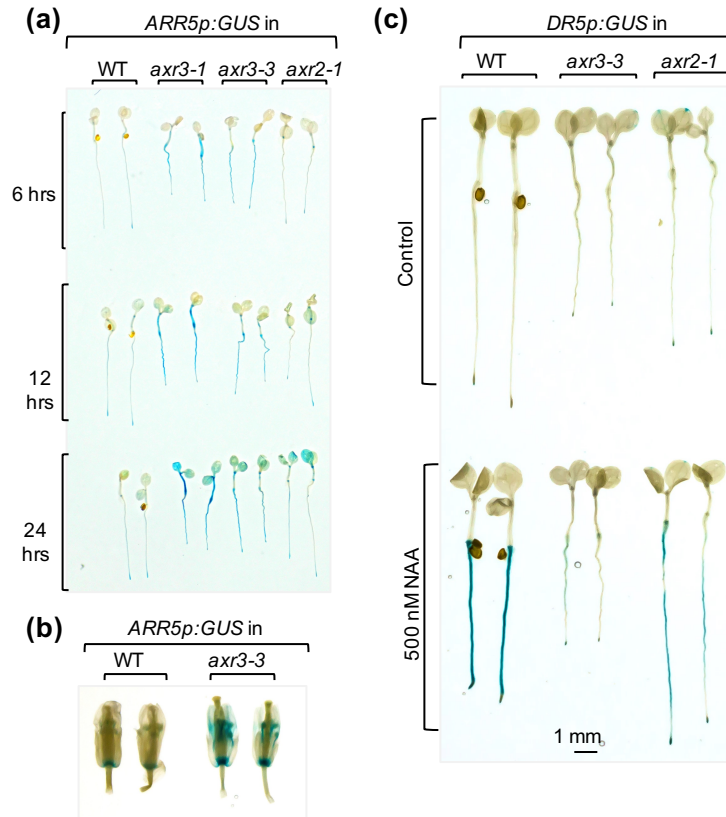

- 5 (a) *ARR5p::GUS* expression in 5-day-old seedlings of the Col-0 wild type (WT) and AUX/IAA mutants *axr3-1*, *axr3-3* and *axr2-1*. The GUS reaction was stopped at the denoted time points to visualize the different expression levels between *axr3* and *axr2* mutants (at the 6 and 12 hrs. time points) and between *axr2* seedlings and the wild type (at the 24 hrs. time point).
- 10 (b) *ARR5p::GUS* expression in flowers of the wild type and the *axr3-3* mutant both containing the *ARR5::GUS* transgene.

(c) *DR5p::GUS* expression in 5-day-old wild type, *axr3-3* and *axr2-1* plants treated for 4 hours with 500 nM of the auxin NAA. The length of the GUS reaction was timed to reveal the *DR5p::GUS* expression differences between the *axr* mutant backgrounds.

### **Co-treatment with high auxin concentration suppresses cytokinin effects**

To determine the minimal effective dose of BA for the induction of the *ARR5p:GUS* reporter gene, we treated the *ARR5p:GUS* line for 4 hours with a range of BA doses (Figure S2(a)). After a 2-hour long incubation with the GUS substrate X-gluc, we determined that a minimum of 25 nM BA is needed for a visible accumulation of the blue colored chloro-bromoindigo in roots of 4-day-old seedlings. Co-treatments with 50 nM BA and different doses of the auxin 1-naphtaleneacetic acid (NAA) revealed that the expression of *ARR5p:GUS* is suppressed in the upper part of the root at the high NAA concentration of 5  $\mu$ M (Figure S2(b)). However, co-treatments with higher BA concentrations (e.g., 200 nM, Figure S2(c)) reversed the NAA-dependent inhibition of *ARR5p:GUS* expression. Because the auxin inhibition of cytokinin-induced *ARR5p:GUS* involved a high concentration of auxin that is likely not to be representative of how the endogenous auxin/cytokinin interaction is regulated, most of our experiments focused on the analyses of auxin resistant mutants that allow to determine the effects of endogenous auxin.

**Figure S2.** High auxin dose suppresses the induction of *ARR5p:GUS* by a low BA dose.

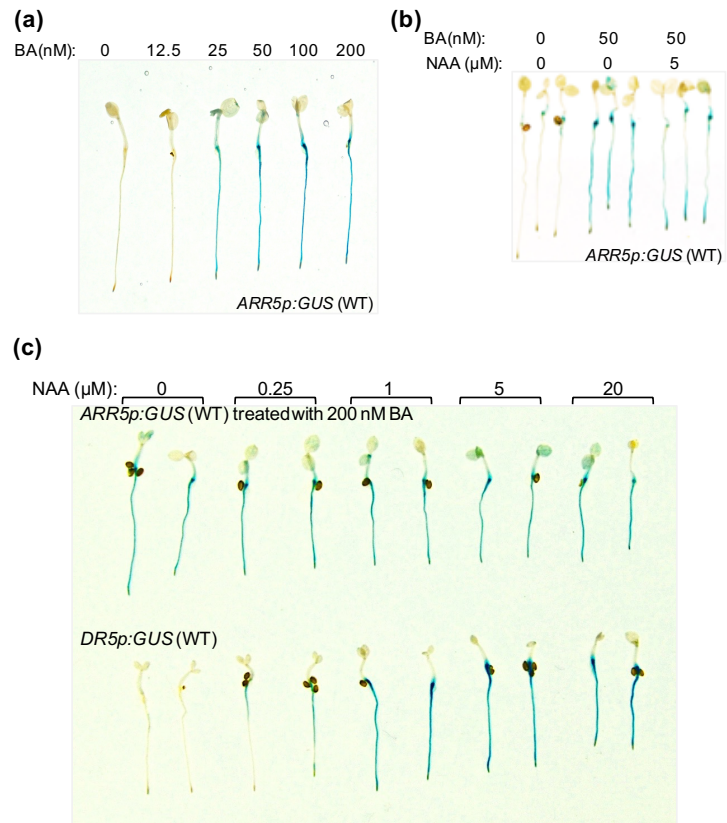

**Figure S2.** High auxin dose suppresses the induction of *ARR5p:GUS* by a low BA dose.

- (a) GUS expression in 5-day-old *ARR5p:GUS* transgenic seedlings treated for 4 hours with a concentration range of the cytokinin BA.
- (b) GUS expression in 5-day-old *ARR5p:GUS* transgenic seedlings treated for 4 hours with the denoted concentrations of BA and NAA.
- (c) GUS expression in 5-day-old 200 nM BA-treated *ARR5p:GUS* co-treated with a range of NAA concentrations for 4 hours. *DR5p:GUS* transgenic seedlings treated with the same NAA concentration range are shown as a control for the auxin effect.

**Figure S3.** BA-induction of *ARR5p:GUS* is enhanced in auxin resistant mutants.

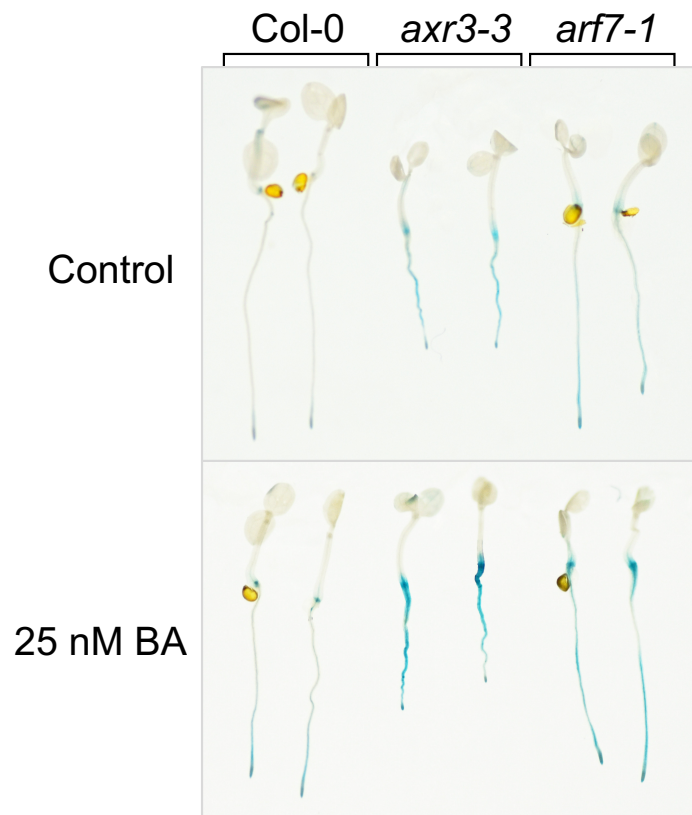

*ARR5p:GUS* expression in 5-day-old seedlings of the wild type Col-0 and auxin resistant mutants *axr3-3* and *arf7-1* treated for 4 hours with 25 nM of the cytokinin BA. The length of the GUS reaction was timed to reveal the *ARR5p:GUS* expression differences between the wild type, *axr3* and *arf7* mutant backgrounds.

5

**Figure S4.** Cytokinin resistance of the *35Sp:ARR5 ARR5p:GUS arf7-1* line.

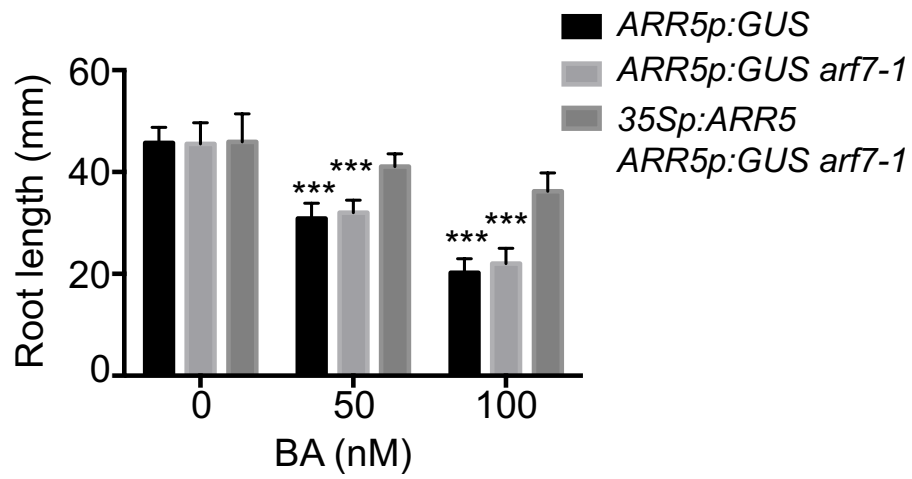

Seedlings of the denoted lines were grown for 4 days on horizontal plates and then transferred to vertical plates with the denoted BA concentration range. Root lengths were measured after an additional 8 days of growth.

5

**Table S1.** List of mutants and transgenic lines used in this study.

5 The genetic background of the mutant or transgenic line is noted in the parenthesis. Type referest to: P/I, point or irradiation mutations; IM, insertion mutations; TL, *Agrobacterium tumefactions* transformation generated transgenic lines. If the line carries a selectable marker, its name is listed in the column “selection”. If a visible phenotype is used for selection, it is listed under “Phenotype”. Km, kanamycin; Basta, phosphinothricin; Hyg, hygromycin.

| Name                                      | Type       | Selection   | Phenotype                                | Ref        |
|-------------------------------------------|------------|-------------|------------------------------------------|------------|
| <i>axr2-1</i>                             | P/I        |             | Auxin resistance                         | (1)        |
| <i>ARR5p:GUS</i>                          | TL         | Km          |                                          | (2)        |
| <i>ARR5p:GUS axr2-1</i>                   | TL,<br>P/I | Km          | Auxin resistance                         | this study |
| <i>axr3-1</i>                             | P/I        |             | Auxin resistance                         | (3)        |
| <i>ARR5p:GUS axr3-1</i>                   | TL,<br>P/I | Km          | Auxin resistance                         | this study |
| <i>axr3-3</i>                             | P/I        |             | Auxin resistance                         | (3)        |
| <i>ARR5p:GUS axr3-3</i>                   | TL,<br>P/I | Km          | Auxin resistance                         | this study |
| <i>35Sp:ARR1<sup>D94E</sup></i>           | TL         | Basta       | Constitutive cytokinin response          | (4)        |
| <i>ARR5p:GUS 35Sp:ARR1<sup>D94E</sup></i> | TL         | Km<br>Basta | Constitutive cytokinin response          | this study |
| <i>arr1-1</i>                             | IM         | Hyg         | Cytokinin resistance                     | (5)        |
| <i>axr3-3 arr1-1</i>                      | P/I<br>IM  | Hyg         | Auxin resistance<br>Cytokinin resistance | this study |
| <i>ARR5p:GUS axr3-3 arr1-1</i>            | P/I<br>IM  | Hyg<br>Km   | Auxin resistance<br>Cytokinin resistance | this study |
| <i>35Sp:ARR5</i>                          | TL         | Basta       | Cytokinin resistance                     | (6)        |
| <i>ARR5p:GUS 35Sp:ARR5 axr3-3</i>         | TL         | Km<br>Basta | Cytokinin resistance<br>Auxin resistance | this study |
| <i>arf7-1</i>                             | IM         |             | Auxin resistance                         | (7)        |
| <i>ARR5p:GUS arf7-1</i>                   | TL<br>IM   |             | Auxin resistance                         | this study |
| <i>ARR5p:GUS 35Sp:ARR5 arf7-1</i>         | TL<br>IM   | Basta       | Cytokinin resistance<br>Auxin resistance | this study |
| <i>arf7-1 arf19-1</i>                     | IM         |             | Auxin resistance                         | (7)        |

|                                          |          |             |                                          |            |
|------------------------------------------|----------|-------------|------------------------------------------|------------|
| <i>arr1-1 arf7-1 arf19-1</i>             | IM       | Hyg         | Cytokinin resistance<br>Auxin resistance | this study |
| <i>DR5p:GUS</i>                          | TL       | Km          |                                          | (8)        |
| <i>DR5p:GUS 35Sp:ARR1<sup>D94E</sup></i> | TL       | Km<br>Basta | Constitutive cytokinin<br>response       | this study |
| <i>arr1-3 arr10-5 arr12-1</i>            | IM       |             | Cytokinin resistance                     | (9)        |
| <i>DR5p:GUS arr1-3 arr10-5 arr12-1</i>   | TL<br>IM |             | Cytokinin resistance                     | this study |
|                                          |          |             |                                          |            |
|                                          |          |             |                                          |            |

1. A. K. Wilson, F. B. Pickett, J. C. Turner, M. Estelle, A dominant mutation in Arabidopsis confers resistance to auxin, ethylene and abscisic acid. *Mol Gen Genet* **222**, 377-383 (1990).
2. I. B. D'Agostino, J. Deruere, J. J. Kieber, Characterization of the response of the Arabidopsis response regulator gene family to cytokinin. *Plant Physiol* **124**, 1706-1717 (2000).
3. D. Rouse, P. Mackay, P. Stirnberg, M. Estelle, O. Leyser, Changes in auxin response from mutations in an AUX/IAA gene. *Science* **279**, 1371-1373 (1998).
4. J. Kurepa, Y. Li, S. E. Perry, J. A. Smalle, Ectopic expression of the phosphomimic mutant version of Arabidopsis response regulator 1 promotes a constitutive cytokinin response phenotype. *BMC Plant Biol* **14**, 28 (2014).
5. H. Sakai *et al.*, ARR1, a transcription factor for genes immediately responsive to cytokinins. *Science* **294**, 1519-1521 (2001).
6. Y. Li, J. Kurepa, J. Smalle, AXR1 promotes the Arabidopsis cytokinin response by facilitating ARR5 proteolysis. *Plant J* **74**, 13-24 (2013).
7. Y. Okushima *et al.*, Functional genomic analysis of the AUXIN RESPONSE FACTOR gene family members in Arabidopsis thaliana: unique and overlapping functions of ARF7 and ARF19. *Plant Cell* **17**, 444-463 (2005).
8. S. Sabatini *et al.*, An auxin-dependent distal organizer of pattern and polarity in the Arabidopsis root. *Cell* **99**, 463-472 (1999).
9. R. D. Argyros *et al.*, Type B response regulators of Arabidopsis play key roles in cytokinin signaling and plant development. *Plant Cell* **20**, 2102-2116 (2008).
